# Supplementary material for: Metal-Assisted Complexation of Fluorogenic Dyes by Cucurbit[7]uril and Cucurbit[8]uril: A DFT Evaluation of the Key Factors Governing the Host–Guest Recognition
Source: MDPI journal article supplement (doi:10.3390/molecules28041540), 2023-02-05
Supplement: s1 [file s1]

# Metal-Assisted Complexation of Fluorogenic Dyes by Cucurbit[7]uril and Cucurbit[8]uril: A DFT Evaluation of the Key Factors Governing the Host–Guest Recognition

Nikoleta Kircheva <sup>1</sup>, Stefan Dobrev <sup>1</sup>, Lyubima Dasheva <sup>2</sup>, Valya Nikolova <sup>2</sup>,  
Silvia Angelova <sup>1,\*</sup> and Todor Dudev <sup>2,\*</sup>

<sup>1</sup>Institute of Optical Materials and Technologies “Acad. J. Malinowski”, Bulgarian Academy of Sciences, 1113 Sofia, Bulgaria

<sup>2</sup>Faculty of Chemistry and Pharmacy, Sofia University “St. Kliment Ohridski”, 1164 Sofia, Bulgaria

\* Correspondence: sea@iomt.bas.bg (S.A.); t.dudev@chem.uni-sofia.bg (T.D.)

**Table S1.** M062X/6–31G(d,p) calculated thermodynamic parameters in kcal mol<sup>−1</sup>.

| Reaction                                                                                                                                                  | ΔH     | TΔS   | ΔG <sup>1</sup> | ΔG <sup>78</sup> |
|-----------------------------------------------------------------------------------------------------------------------------------------------------------|--------|-------|-----------------|------------------|
| CB[7] + TO <sup>+</sup> → CB[7]@TO <sup>+</sup>                                                                                                           | −64.0  | −23.6 | −40.5           | −12.0            |
| CB[7] + TfT <sup>+</sup> → CB[7]@TfT <sup>+</sup>                                                                                                         | −69.6  | −22.1 | −47.5           | −12.3            |
| CB[7] + NR <sup>0</sup> → CB[7]@NR <sup>0</sup>                                                                                                           | −28.1  | −19.5 | −8.6            | 1.3              |
| CB[7] + NRH <sup>+</sup> → CB[7]@NRH <sup>+</sup>                                                                                                         | −65.5  | −18.7 | −46.7           | −9.4             |
|                                                                                                                                                           |        |       |                 |                  |
| CB[8] + TO <sup>+</sup> → CB[8]@TO <sup>+</sup>                                                                                                           | −62.4  | −21.9 | −40.5           | −11.1            |
| CB[8] + TfT <sup>+</sup> → CB[8]@TfT <sup>+</sup>                                                                                                         | −61.9  | −21.6 | −40.3           | −6.7             |
| CB[8] + NR <sup>0</sup> → CB[8]@NR <sup>0</sup>                                                                                                           | −29.1  | −21.1 | −8.0            | 5.0              |
| CB[8] + NRH <sup>+</sup> → CB[8]@NRH <sup>+</sup>                                                                                                         | −60.3  | −20.6 | −39.8           | −1.5             |
|                                                                                                                                                           |        |       |                 |                  |
| Substitution                                                                                                                                              |        |       |                 |                  |
| CB[7]@TO <sup>+</sup> + Mg <sup>2+</sup> → CB[7]@Mg <sup>2+</sup> + TO <sup>+</sup>                                                                       | −245.9 | 10.2  | −256.1          | −35.9            |
| CB[7]@TfT <sup>+</sup> + Mg <sup>2+</sup> → CB[7]@Mg <sup>2+</sup> + TfT <sup>+</sup>                                                                     | −240.3 | 8.8   | −249.1          | −35.6            |
| CB[7]@NRH <sup>+</sup> + Mg <sup>2+</sup> → CB[7]@Mg <sup>2+</sup> + NRH <sup>+</sup>                                                                     | −244.5 | 5.4   | −249.8          | −38.5            |
|                                                                                                                                                           |        |       |                 |                  |
| CB[8]@TO <sup>+</sup> + Mg <sup>2+</sup> → CB[8]@Mg <sup>2+</sup> + TO <sup>+</sup>                                                                       | −243.1 | 7.5   | −250.6          | −34.5            |
| CB[8]@TfT <sup>+</sup> + Mg <sup>2+</sup> → CB[8]@Mg <sup>2+</sup> + TfT <sup>+</sup>                                                                     | −236.7 | 7.1   | −250.8          | −38.9            |
| CB[8]@NRH <sup>+</sup> + Mg <sup>2+</sup> → CB[8]@Mg <sup>2+</sup> + NRH <sup>+</sup>                                                                     | −245.2 | 6.1   | −251.3          | −44.1            |
|                                                                                                                                                           |        |       |                 |                  |
| CB[7]@TO <sup>+</sup> + [Mg(H <sub>2</sub> O) <sub>6</sub> ] <sup>2+</sup> → CB[7]@[Mg(H <sub>2</sub> O) <sub>6</sub> ] <sup>2+</sup> + TO <sup>+</sup>   | −92.4  | 2.2   | −94.7           | −15.6            |
| CB[7]@TfT <sup>+</sup> + [Mg(H <sub>2</sub> O) <sub>6</sub> ] <sup>2+</sup> → CB[7]@[Mg(H <sub>2</sub> O) <sub>6</sub> ] <sup>2+</sup> + TfT <sup>+</sup> | −86.8  | 0.8   | −87.6           | −15.3            |
| CB[7]@NRH <sup>+</sup> + [Mg(H <sub>2</sub> O) <sub>6</sub> ] <sup>2+</sup> → CB[7]@[Mg(H <sub>2</sub> O) <sub>6</sub> ] <sup>2+</sup> + NRH <sup>+</sup> | −91.0  | −2.6  | −88.4           | −18.2            |
|                                                                                                                                                           |        |       |                 |                  |
| CB[8]@TO <sup>+</sup> + [Mg(H <sub>2</sub> O) <sub>6</sub> ] <sup>2+</sup> → CB[8]@[Mg(H <sub>2</sub> O) <sub>6</sub> ] <sup>2+</sup> + TO <sup>+</sup>   | −82.4  | −3.9  | −78.6           | 4.6              |
| CB[8]@TfT <sup>+</sup> + [Mg(H <sub>2</sub> O) <sub>6</sub> ] <sup>2+</sup> → CB[8]@[Mg(H <sub>2</sub> O) <sub>6</sub> ] <sup>2+</sup> + TfT <sup>+</sup> | −83.0  | −4.2  | −78.7           | 0.2              |
| CB[8]@NRH <sup>+</sup> + [Mg(H <sub>2</sub> O) <sub>6</sub> ] <sup>2+</sup> → CB[8]@[Mg(H <sub>2</sub> O) <sub>6</sub> ] <sup>2+</sup> + NRH <sup>+</sup> | −84.5  | −5.2  | −79.3           | −5.0             |
|                                                                                                                                                           |        |       |                 |                  |
| Addition                                                                                                                                                  |        |       |                 |                  |
| CB[7]@TO <sup>+</sup> + Mg <sup>2+</sup> → CB[7]@TO <sup>+</sup> @Mg <sup>2+</sup>                                                                        | −242.4 | −11.5 | −230.9          | −32.0            |
| CB[7]@TfT <sup>+</sup> + Mg <sup>2+</sup> → CB[7]@TfT <sup>+</sup> @Mg <sup>2+</sup>                                                                      | −243.2 | −10.1 | −233.1          | −45.9            |

|                                                                                                                                                          |        |       |        |       |
|----------------------------------------------------------------------------------------------------------------------------------------------------------|--------|-------|--------|-------|
| CB[7]@NRH <sup>+</sup> + Mg <sup>2+</sup> → CB[7]@NRH <sup>+</sup> @Mg <sup>2+</sup>                                                                     | -236.9 | -12.9 | -224.1 | -35.5 |
| CB[8]@TO <sup>+</sup> + Mg <sup>2+</sup> → CB[8]@TO <sup>+</sup> @Mg <sup>2+</sup>                                                                       | -235.3 | -10.4 | -224.9 | -34.1 |
| CB[8]@TfT <sup>+</sup> + Mg <sup>2+</sup> → CB[8]@TfT <sup>+</sup> @Mg <sup>2+</sup>                                                                     | -229.9 | -13.0 | -216.9 | -43.1 |
| CB[8]@NRH <sup>+</sup> + Mg <sup>2+</sup> → CB[8]@NRH <sup>+</sup> @Mg <sup>2+</sup>                                                                     | -235.4 | -13.4 | -222.0 | -31.0 |
| CB[7]@TO <sup>+</sup> + [Mg(H <sub>2</sub> O) <sub>6</sub> ] <sup>2+</sup> → CB[7]@TO <sup>+</sup> @[Mg(H <sub>2</sub> O) <sub>6</sub> ] <sup>2+</sup>   | -28.3  | -15.9 | -12.4  | -1.0  |
| CB[7]@TfT <sup>+</sup> + [Mg(H <sub>2</sub> O) <sub>6</sub> ] <sup>2+</sup> → CB[7]@TfT <sup>+</sup> @[Mg(H <sub>2</sub> O) <sub>6</sub> ] <sup>2+</sup> | -51.1  | -23.9 | -27.1  | -7.0  |
| CB[7]@NRH <sup>+</sup> + [Mg(H <sub>2</sub> O) <sub>6</sub> ] <sup>2+</sup> → CB[7]@NRH <sup>+</sup> @[Mg(H <sub>2</sub> O) <sub>6</sub> ] <sup>2+</sup> | -45.5  | -20.0 | -25.5  | -6.4  |
| CB[8]@TO <sup>+</sup> + [Mg(H <sub>2</sub> O) <sub>6</sub> ] <sup>2+</sup> → CB[8]@TO <sup>+</sup> @[Mg(H <sub>2</sub> O) <sub>6</sub> ] <sup>2+</sup>   | -52.0  | -20.3 | -31.7  | -10.1 |
| CB[8]@TfT <sup>+</sup> + [Mg(H <sub>2</sub> O) <sub>6</sub> ] <sup>2+</sup> → CB[8]@TfT <sup>+</sup> @[Mg(H <sub>2</sub> O) <sub>6</sub> ] <sup>2+</sup> | -67.8  | -22.0 | -45.8  | -12.6 |
| CB[8]@NRH <sup>+</sup> + [Mg(H <sub>2</sub> O) <sub>6</sub> ] <sup>2+</sup> → CB[8]@NRH <sup>+</sup> @[Mg(H <sub>2</sub> O) <sub>6</sub> ] <sup>2+</sup> | -69.1  | -24.8 | -44.3  | -14.1 |

**Table S2.** Gibbs energies of CB@dye formation in a gas phase ( $\Delta G^1$ ) and aqueous solution ( $\Delta G^{78}$ ) in kcal mol<sup>-1</sup>.

| Reaction                                          | $\Delta G^1$ | $\Delta G^{78}$ |
|---------------------------------------------------|--------------|-----------------|
| CB[7] + TO <sup>+</sup> → CB[7]@TO <sup>+</sup>   | -37.4        | -5.0            |
| CB[7] + TfT <sup>+</sup> → CB[7]@TfT <sup>+</sup> | -44.7        | -5.5            |
| CB[7] + NRH <sup>+</sup> → CB[7]@NRH <sup>+</sup> | -43.9        | -3.0            |
| CB[7] + NR <sup>0</sup> → CB[7]@NR                | -7.0         | 7.5             |
| CB[8] + TO <sup>+</sup> → CB[8]@TO <sup>+</sup>   | -38.1        | -4.9            |
| CB[8] + TfT <sup>+</sup> → CB[8]@TfT <sup>+</sup> | -38.7        | -1.4            |
| CB[8] + NRH <sup>+</sup> → CB[8]@NRH <sup>+</sup> | -37.7        | 4.6             |
| CB[8] + NR <sup>0</sup> → CB[8]@NR <sup>0</sup>   | -6.1         | 11.9            |

**Table S3.** Gibbs energies of CB@dye formation in a gas phase ( $\Delta G^1$ ) and aqueous solution ( $\Delta G^{78}$ ) in kcal mol<sup>-1</sup>, where the initial CB[7]@8W is considered.

| Reaction                                          | $\Delta G^1$ | $\Delta G^{78}$ |
|---------------------------------------------------|--------------|-----------------|
| CB[7] + TO <sup>+</sup> → CB[7]@TO <sup>+</sup>   | -9.1         | -8.2            |
| CB[7] + TfT <sup>+</sup> → CB[7]@TfT <sup>+</sup> | -16.5        | -8.7            |
| CB[7] + NRH <sup>+</sup> → CB[7]@NRH <sup>+</sup> | -15.7        | -6.2            |
| CB[7] + NR <sup>0</sup> → CB[7]@NR                | 21.3         | 4.3             |

**Table S4.** Gibbs energies of CB@M<sup>n+</sup> formation through substitution of the dye molecule in a gas phase ( $\Delta G^1$ ) and aqueous solution ( $\Delta G^{78}$ ) in kcal mol<sup>-1</sup>.

| Substitution                                                                          | $\Delta G^1$ | $\Delta G^{78}$ |
|---------------------------------------------------------------------------------------|--------------|-----------------|
| CB[7]@TO <sup>+</sup> + Mg <sup>2+</sup> → CB[7]@Mg <sup>2+</sup> + TO <sup>+</sup>   | -249.9       | -33.0           |
| CB[7]@NRH <sup>+</sup> + Mg <sup>2+</sup> → CB[7]@Mg <sup>2+</sup> + NRH <sup>+</sup> | -238.0       | -35.0           |
| CB[7]@TfT <sup>+</sup> + Mg <sup>2+</sup> → CB[7]@Mg <sup>2+</sup> + TfT <sup>+</sup> | -242.6       | -32.5           |
| CB[7]@TfT <sup>+</sup> + Ga <sup>3+</sup> → CB[7]@Ga <sup>3+</sup> + TfT <sup>+</sup> | -704.3       | -240.4          |
| CB[8]@TO <sup>+</sup> + Mg <sup>2+</sup> → CB[8]@Mg <sup>2+</sup> + TO <sup>+</sup>   | -244.3       | -30.6           |
| CB[8]@TfT <sup>+</sup> + Mg <sup>2+</sup> → CB[8]@Mg <sup>2+</sup> + TfT <sup>+</sup> | -243.8       | -34.1           |
| CB[8]@NRH <sup>+</sup> + Mg <sup>2+</sup> → CB[8]@Mg <sup>2+</sup> + NRH <sup>+</sup> | -244.8       | -40.2           |

|                                                                                                                                                                                             |        |       |
|---------------------------------------------------------------------------------------------------------------------------------------------------------------------------------------------|--------|-------|
| CB[7]@TO <sup>+</sup> + [Mg(H <sub>2</sub> O) <sub>6</sub> ] <sup>2+</sup> → CB[7]@[Mg(H <sub>2</sub> O) <sub>6</sub> ] <sup>2+</sup> + TO <sup>+</sup>                                     | -88.2  | -10.0 |
| CB[7]@NRH <sup>+</sup> + [Mg(H <sub>2</sub> O) <sub>6</sub> ] <sup>2+</sup> → CB[7]@[Mg(H <sub>2</sub> O) <sub>6</sub> ] <sup>2+</sup> + NRH <sup>+</sup>                                   | -81.7  | -12.0 |
| CB[7]@TfT <sup>+</sup> + [Mg(H <sub>2</sub> O) <sub>6</sub> ] <sup>2+</sup> → CB[7]@[Mg(H <sub>2</sub> O) <sub>6</sub> ] <sup>2+</sup> + TfT <sup>+</sup>                                   | -80.9  | -9.5  |
| CB[7]@TfT <sup>+</sup> + [Ga(H <sub>2</sub> O) <sub>6</sub> ] <sup>3+</sup> → CB[7]@[Ga(H <sub>2</sub> O) <sub>6</sub> ] <sup>3+</sup> + TfT <sup>+</sup>                                   | -224.4 | -28.3 |
| CB[7]@TfT <sup>+</sup> + [Ga(OH) <sub>4</sub> (H <sub>2</sub> O) <sub>2</sub> ] <sup>-</sup> → CB[7]@[Ga(OH) <sub>4</sub> (H <sub>2</sub> O) <sub>2</sub> ] <sup>-</sup> + TfT <sup>+</sup> | 12.3   | -6.5  |
|                                                                                                                                                                                             |        |       |
| CB[8]@TO <sup>+</sup> + [Mg(H <sub>2</sub> O) <sub>6</sub> ] <sup>2+</sup> → CB[8]@[Mg(H <sub>2</sub> O) <sub>6</sub> ] <sup>2+</sup> + TO <sup>+</sup>                                     | -74.3  | 8.5   |
| CB[8]@TfT <sup>+</sup> + [Mg(H <sub>2</sub> O) <sub>6</sub> ] <sup>2+</sup> → CB[8]@[Mg(H <sub>2</sub> O) <sub>6</sub> ] <sup>2+</sup> + TfT <sup>+</sup>                                   | -73.7  | 5.0   |
| CB[8]@NRH <sup>+</sup> + [Mg(H <sub>2</sub> O) <sub>6</sub> ] <sup>2+</sup> → CB[8]@[Mg(H <sub>2</sub> O) <sub>6</sub> ] <sup>2+</sup> + NRH <sup>+</sup>                                   | -74.7  | -1.0  |

**Table S5.** Gibbs energies of CB@dye@M<sup>n+</sup> formation through addition of metal cation in a gas phase ( $\Delta G^1$ ) and aqueous solution ( $\Delta G^{78}$ ) in kcal mol<sup>-1</sup>.

| Addition                                                                                                                                                                                   | $\Delta G^1$ | $\Delta G^{78}$ |
|--------------------------------------------------------------------------------------------------------------------------------------------------------------------------------------------|--------------|-----------------|
| CB[7]@TO <sup>+</sup> + Mg <sup>2+</sup> → CB[7]@TO <sup>+</sup> @Mg <sup>2+</sup>                                                                                                         | -223.0       | -24.0           |
| CB[7]@NRH <sup>+</sup> + Mg <sup>2+</sup> → CB[7]@NRH <sup>+</sup> @Mg <sup>2+</sup>                                                                                                       | -215.6       | -26.4           |
| CB[7]@TfT <sup>+</sup> + Mg <sup>2+</sup> → CB[7]@TfT <sup>+</sup> @Mg <sup>2+</sup>                                                                                                       | -224.7       | -36.5           |
| CB[7]@TfT <sup>+</sup> + Ga <sup>3+</sup> → CB[7]@TfT <sup>+</sup> @Ga <sup>3+</sup>                                                                                                       | -703.0       | -274.3          |
|                                                                                                                                                                                            |              |                 |
| CB[8]@TO <sup>+</sup> + Mg <sup>2+</sup> → CB[8]@TO <sup>+</sup> @Mg <sup>2+</sup>                                                                                                         | -216.7       | -25.5           |
| CB[8]@TfT <sup>+</sup> + Mg <sup>2+</sup> → CB[8]@TfT <sup>+</sup> @Mg <sup>2+</sup>                                                                                                       | -207.3       | -32.1           |
| CB[8]@NRH <sup>+</sup> + Mg <sup>2+</sup> → CB[8]@NRH <sup>+</sup> @Mg <sup>2+</sup>                                                                                                       | -212.7       | -20.9           |
|                                                                                                                                                                                            |              |                 |
| CB[7]@TO <sup>+</sup> + [Mg(H <sub>2</sub> O) <sub>6</sub> ] <sup>2+</sup> → CB[7]@TO <sup>+</sup> @[Mg(H <sub>2</sub> O) <sub>6</sub> ] <sup>2+</sup>                                     | -8.6         | 4.9             |
| CB[7]@NRH <sup>+</sup> + [Mg(H <sub>2</sub> O) <sub>6</sub> ] <sup>2+</sup> → CB[7]@NRH <sup>+</sup> @[Mg(H <sub>2</sub> O) <sub>6</sub> ] <sup>2+</sup>                                   | -20.7        | 0.8             |
| CB[7]@TfT <sup>+</sup> + [Mg(H <sub>2</sub> O) <sub>6</sub> ] <sup>2+</sup> → CB[7]@TfT <sup>+</sup> @[Mg(H <sub>2</sub> O) <sub>6</sub> ] <sup>2+</sup>                                   | -19.7        | 2.9             |
| CB[7]@TfT <sup>+</sup> + [Ga(H <sub>2</sub> O) <sub>6</sub> ] <sup>3+</sup> → CB[7]@TfT <sup>+</sup> @[Ga(H <sub>2</sub> O) <sub>6</sub> ] <sup>3+</sup>                                   | -125.2       | -14.1           |
| CB[7]@TfT <sup>+</sup> + [Ga(OH) <sub>4</sub> (H <sub>2</sub> O) <sub>2</sub> ] <sup>-</sup> → CB[7]@TfT <sup>+</sup> @[Ga(OH) <sub>4</sub> (H <sub>2</sub> O) <sub>2</sub> ] <sup>-</sup> | -49.8        | 4.3             |
|                                                                                                                                                                                            |              |                 |
| CB[8]@TO <sup>+</sup> + [Mg(H <sub>2</sub> O) <sub>6</sub> ] <sup>2+</sup> → CB[8]@TO <sup>+</sup> @[Mg(H <sub>2</sub> O) <sub>6</sub> ] <sup>2+</sup>                                     | -25.2        | -1.1            |
| CB[8]@TfT <sup>+</sup> + [Mg(H <sub>2</sub> O) <sub>6</sub> ] <sup>2+</sup> → CB[8]@TfT <sup>+</sup> @[Mg(H <sub>2</sub> O) <sub>6</sub> ] <sup>2+</sup>                                   | -38.4        | -2.5            |
| CB[8]@NRH <sup>+</sup> + [Mg(H <sub>2</sub> O) <sub>6</sub> ] <sup>2+</sup> → CB[8]@NRH <sup>+</sup> @[Mg(H <sub>2</sub> O) <sub>6</sub> ] <sup>2+</sup>                                   | -36.5        | -3.8            |

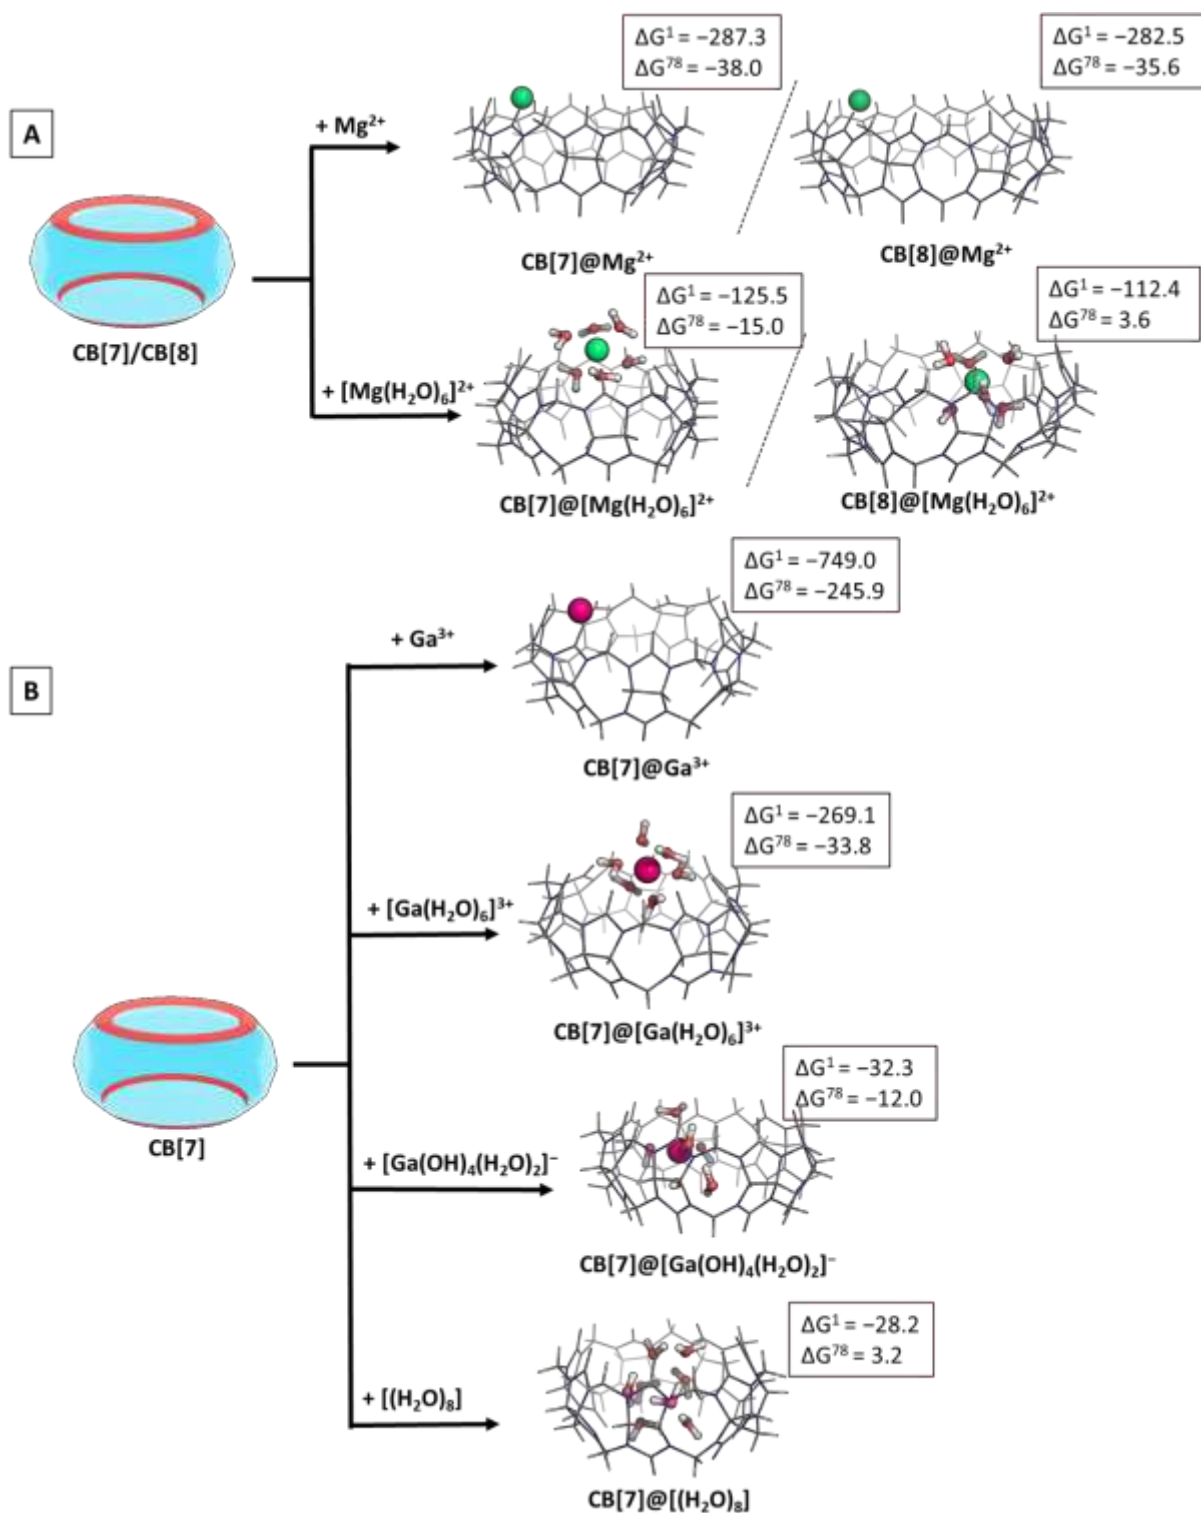

**Figure S1.** M062X/6-31G(d,p) optimized structures of the CB[7/8] complexes with bare (non-hydrated) and hydrated  $\text{Mg}^{2+}$  (A) cations,  $\text{Ga}^{3+}$  (B) cations and eight water molecules (B) in the gas phase;  $\Delta G^\circ$  values in kcal mol $^{-1}$  for the complex formation in gas phase ( $\epsilon = 1$ ), and water ( $\epsilon = 78$ ) at the M062X/6-31+G(d,p)/M062X/6-31G(d,p) level of theory.
